# Supplementary material for: The role of laterally transferred genes in adaptive evolution
Source: Springer Nature journal article supplement (doi:10.1186/1471-2148-7-s1-s8), 2007-02-08
Supplement: Additional file 10 [file 1471-2148-7-s1-s8-s10.pdf]

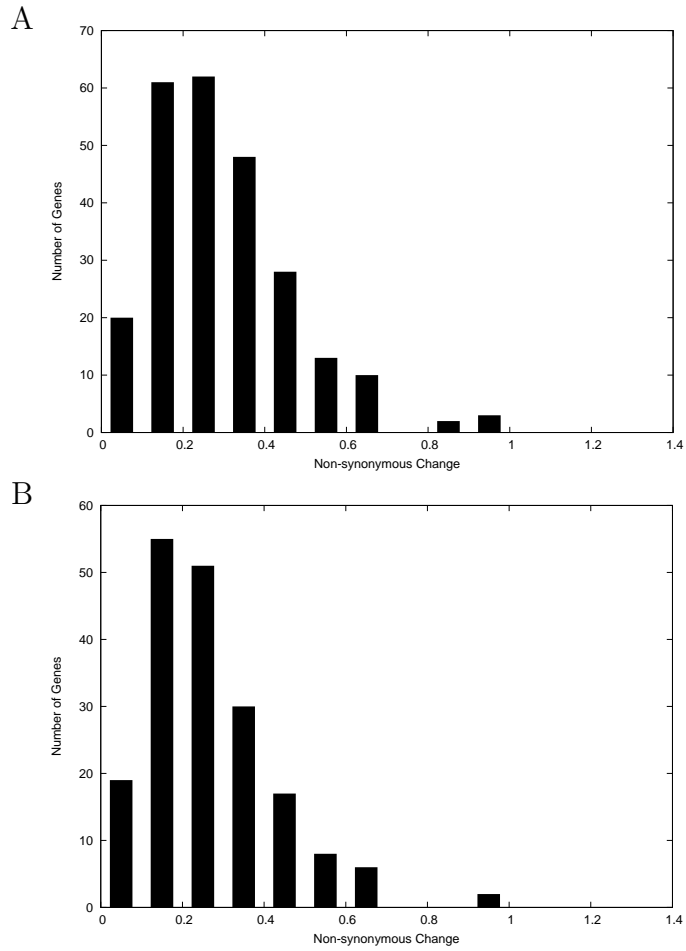

Figure S.1: Non-synonymous change of the genes present in Cgl and Cef. A, genes present in Cgl and Cef; B, genes present in Cgl and Cef and having matches in the database. Genes show similar rates of evolution by only looking at the genes having matches elsewhere the genome database.
